# Supplementary material for: Study on the therapeutic material basis and effect of Acanthopanax senticosus (Rupr. et Maxim.) Harms leaves in the treatment of ischemic stroke by PK-PD analysis based on online microdialysis–LC-MS/MS method
Source: Royal Society of Chemistry journal article supplement (doi:10.1039/c9fo02475a), 2020-01-01
Supplement: c9fo02475a1.pdf [file c9fo02475a1.pdf]

1 **Electronic supplementary information**

2  
3 **Study on the therapeutic material basis and effect of Acanthopanax**  
4 **senticosus leaves in the treatment of ischemic stroke by PK-PD analysis**  
5 **based on online microdialysis-LC-MS/MS method**

6 Yu Wang<sup>a, b, c</sup>, Shu Liu<sup>b</sup>, Rongjin Wang<sup>a</sup>, Liqiang Shi<sup>a</sup>, Zhiqiang Liu<sup>b</sup>, Zhongying Liu<sup>a, \*</sup>

7  
8 <sup>a</sup> School of Pharmaceutical Sciences, Jilin University, Changchun 130021, China

9 <sup>b</sup> National Center of Mass Spectrometry in Changchun & Jilin Provincial Key Laboratory of Chinese Medicine Chemistry  
10 and Mass Spectrometry, Changchun Institute of Applied Chemistry, Chinese Academy of Sciences, Changchun, 130022,  
11 China

12 <sup>c</sup> Experiment Center for Science and Technology, Shanghai University of Traditional Chinese Medicine, Shanghai, 201203,  
13 China

14  
15  
16  
17  
18  
19  
20 \*Corresponding authors: Zhongying Liu

21 School of Pharmaceutical Sciences, Jilin University, Changchun 130021, Jilin, China.

22 Tel.: +86-431-85262613; Fax: +86-431-85262236

23 E-mail address: liuzy@jlu.edu.cn (Z.Y. Liu)

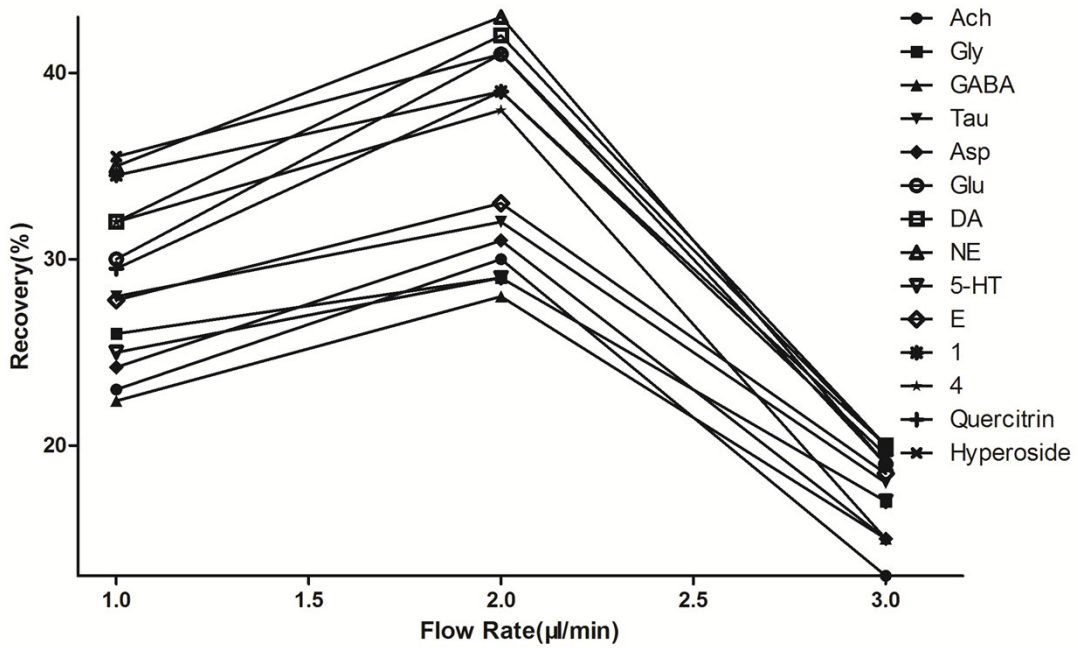

25

26 Figure S.1 Comparison of blood probe recoveries of 14 analytes at different perfusion rates and at a concentration of 5.0  $\mu\text{M}$

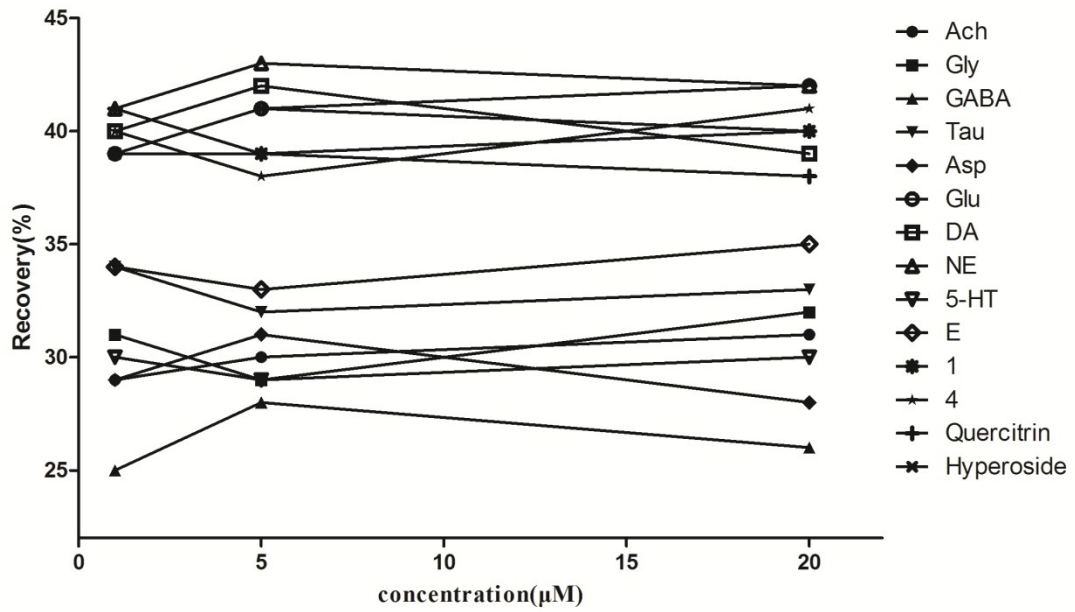

27

28 Figure S.2 Comparison of blood probe recoveries of 14 analytes at different concentration and at a perfusion rate of 2.0  
29  $\mu\text{L}/\text{min}$

30

31

Table S.1 MRM parameters for 16 analytes

| Analytes      | Parent ion ( <i>m/z</i> ) | Cone voltage (V) | Daughter ion ( <i>m/z</i> ) | Collision energy (eV) |
|---------------|---------------------------|------------------|-----------------------------|-----------------------|
| DA            | 153.97                    | 12               | 137.00                      | 10                    |
|               |                           |                  | 91.08                       | 22                    |
| Ach           | 146.03                    | 22               | 87.04                       | 12                    |
|               |                           |                  | 60.11                       | 10                    |
| Asp           | 133.97                    | 12               | 74.03                       | 14                    |
|               |                           |                  | 88.07                       | 10                    |
| GABA          | 103.97                    | 14               | 86.99                       | 10                    |
|               |                           |                  | 68.03                       | 14                    |
| Glu           | 147.97                    | 14               | 84.11                       | 16                    |
|               |                           |                  | 130.03                      | 8                     |
| Gly           | 75.97                     | 14               | 30.19                       | 8                     |
|               |                           |                  | 48.14                       | 6                     |
| 5-HT          | 176.97                    | 10               | 160.02                      | 8                     |
|               |                           |                  | 132.06                      | 20                    |
| Tau           | 125.90                    | 22               | 108.02                      | 12                    |
|               |                           |                  | 44.19                       | 14                    |
| E             | 183.97                    | 12               | 166.04                      | 6                     |
|               |                           |                  | 107.06                      | 24                    |
| NE            | 169.97                    | 6                | 152.04                      | 8                     |
|               |                           |                  | 107.03                      | 18                    |
| Rutin         | 609.16                    | 42               | 300.06                      | 36                    |
|               |                           |                  | 270.94                      | 48                    |
| Hyperoside    | 463.03                    | 36               | 300.06                      | 28                    |
|               |                           |                  | 270.94                      | 42                    |
| Quercitrin    | 447.10                    | 36               | 300.12                      | 28                    |
|               |                           |                  | 270.94                      | 44                    |
| Isoquercitrin | 463.10                    | 40               | 270.94                      | 38                    |
|               |                           |                  | 254.95                      | 36                    |
| 1,3-diCQA     | 515.10                    | 18               | 191.04                      | 32                    |
|               |                           |                  | 353.04                      | 16                    |
| 4,5-diCQA     | 514.86                    | 25               | 352.91                      | 17                    |
|               |                           |                  | 172.90                      | 21                    |

Table S.2 Linearity, LOD and LOQ for 14 analytes

| Analytes   | R <sup>2</sup> | Regression equation | Dynamic range (μM) | LOD (μM) | LOQ (μM) |
|------------|----------------|---------------------|--------------------|----------|----------|
| Ach        | 0.9944         | y=0.8154x+3.8703    | 1.0000~20.00       | 0.1000   | 0.5000   |
| Gly        | 0.9962         | y=0.0036x+0.0254    | 2.500~20.00        | 0.2500   | 0.7500   |
| GABA       | 0.9810         | y=0.2189x+0.5520    | 2.500~20.00        | 0.2500   | 0.7500   |
| Tau        | 0.9963         | y=0.0119x+0.0390    | 1.000~20.00        | 0.1000   | 0.5000   |
| Asp        | 0.9918         | y=0.0393x+0.0996    | 1.000~20.00        | 0.1000   | 0.5000   |
| Glu        | 0.9815         | y=0.2075x+0.0968    | 0.5000~20.00       | 0.0500   | 0.2500   |
| DA         | 0.9919         | y=0.2410x+0.3998    | 1.000~20.00        | 0.0500   | 0.2500   |
| NE         | 0.9999         | y=0.1886x+1.1022    | 2.500~20.00        | 0.0500   | 0.2500   |
| 5-HT       | 0.9858         | y=0.0773x+0.2107    | 2.500~20.00        | 0.0250   | 0.1250   |
| E          | 0.9938         | y=0.3218x-0.9894    | 2.500~20.00        | 0.0250   | 0.1250   |
| 1,3-diCOQ  | 0.9974         | y=5715.32x+6173.52  | 0.5000~20.00       | 0.0250   | 0.1250   |
| 4,5-diCOQ  | 0.9986         | y=1592.85x+496.721  | 0.5000~20.00       | 0.0250   | 0.1250   |
| Quercitrin | 0.9935         | y=27302.7x-346.295  | 0.1000~100.0       | 0.0010   | 0.0050   |
| Hyperoside | 0.9960         | y=29461.3x+60180.6  | 1.000~100.0        | 0.05000  | 0.2500   |

Table S.3 The precision and accuracy for 14 analytes

| Analytes   | Added ( $\mu\text{M}$ ) | inter-day(n=5)      |                  |                | intra-day(n=5)      |                   |                |
|------------|-------------------------|---------------------|------------------|----------------|---------------------|-------------------|----------------|
|            |                         | Observed            | Precision(RSD,%) | Accuracy(RE,%) | Observed            | Precision (RSD,%) | Accuracy(RE,%) |
| Ach        | 1                       | 0.9800 $\pm$ 0.0200 | -1.630           | -2.000         | 1.030 $\pm$ 0.0200  | 1.940             | 3.020          |
|            | 5                       | 5.080 $\pm$ 0.5600  | 11.02            | 1.600          | 5.050 $\pm$ 0.7200  | 14.25             | 1.010          |
|            | 20                      | 20.22 $\pm$ 0.3400  | 1.680            | 1.100          | 19.94 $\pm$ 1.560   | 7.820             | 0.300          |
| Gly        | 1                       | 0.8700 $\pm$ 0.1300 | -14.94           | -1.300         | 0.910 $\pm$ 0.090   | -9.900            | 9.000          |
|            | 5                       | 4.880 $\pm$ 0.1700  | -3.480           | -2.400         | 5.110 $\pm$ 0.4500  | 8.800             | 2.200          |
|            | 20                      | 21.09 $\pm$ 2.1700  | 10.29            | 5.450          | 22.80 $\pm$ 1.290   | 5.450             | 14.00          |
| GABA       | 1                       | 0.8800 $\pm$ 0.0900 | -10.22           | -12.00         | 0.9300 $\pm$ 0.1100 | 11.83             | 7.000          |
|            | 5                       | 4.830 $\pm$ 0.5900  | -12.22           | -3.400         | 5.180 $\pm$ 0.6600  | 12.74             | 3.600          |
|            | 20                      | 18.61 $\pm$ 1.380   | -7.420           | -6.950         | 19.18 $\pm$ 2.410   | -12.57            | -4.100         |
| Tau        | 1                       | 1.090 $\pm$ 0.1500  | 13.76            | 9.010          | 0.8700 $\pm$ 0.1300 | -14.94            | -13.00         |
|            | 5                       | 5.330 $\pm$ 0.6800  | 12.76            | 6.600          | 5.200 $\pm$ 0.4900  | 9.420             | 4.000          |
|            | 20                      | 22.08 $\pm$ 2.130   | 9.650            | 10.40          | 21.37 $\pm$ 2.050   | 9.590             | 6.850          |
| Asp        | 1                       | 0.8900 $\pm$ 0.0900 | -10.11           | -10.98         | 0.8700 $\pm$ 0.1200 | -13.79            | 13.01          |
|            | 5                       | 4.780 $\pm$ 0.6900  | -14.44           | -4.400         | 5.140 $\pm$ 0.5500  | 10.70             | 2.800          |
|            | 20                      | 22.44 $\pm$ 3.010   | 13.41            | 12.20          | 21.39 $\pm$ 1.990   | 9.300             | 6.950          |
| Glu        | 1                       | 1.120 $\pm$ 0.1300  | 11.61            | 12.02          | 1.020 $\pm$ 0.0900  | 8.820             | 2.030          |
|            | 5                       | 4.770 $\pm$ 0.4900  | -10.27           | -4.610         | 5.130 $\pm$ 0.3200  | 6.240             | 2.600          |
|            | 20                      | 21.93 $\pm$ 2.870   | 13.09            | 9.650          | 22.09 $\pm$ 2.660   | 12.04             | 10.45          |
| DA         | 1                       | 0.8700 $\pm$ 0.1100 | -12.64           | -13.02         | 1.090 $\pm$ 0.1400  | 12.84             | 9.010          |
|            | 5                       | 4.8900 $\pm$ 0.5700 | -11.66           | -2.230         | 5.230 $\pm$ 0.7300  | 13.96             | 4.600          |
|            | 20                      | 21.49 $\pm$ 2.710   | 12.61            | 7.450          | 22.85 $\pm$ 2.950   | 12.91             | 14.25          |
| NE         | 1                       | 0.8800 $\pm$ 0.0800 | -9.090           | -12.01         | 0.8600 $\pm$ 0.080  | -9.300            | -14.02         |
|            | 5                       | 5.240 $\pm$ 0.5500  | 10.50            | 4.800          | 4.770 $\pm$ 0.6800  | -14.26            | -4.600         |
|            | 20                      | 18.75 $\pm$ 1.970   | -10.51           | -6.250         | 22.31 $\pm$ 2.180   | 9.770             | 11.55          |
| 5-HT       | 1                       | 0.8900 $\pm$ 0.1300 | -14.61           | -11.02         | 0.9700 $\pm$ 0.1100 | -11.34            | -3.000         |
|            | 5                       | 4.830 $\pm$ 0.6700  | -13.87           | -3.400         | 5.230 $\pm$ 0.7100  | 13.58             | 4.600          |
|            | 20                      | 22.18 $\pm$ 2.660   | 11.99            | 10.90          | 22.39 $\pm$ 1.990   | 8.890             | 11.95          |
| E          | 1                       | 1.130 $\pm$ 0.0300  | 2.650            | 13.00          | 1.140 $\pm$ 0.1500  | 13.16             | 14.04          |
|            | 5                       | 5.240 $\pm$ 0.4800  | 9.160            | 4.800          | 4.870 $\pm$ 0.7200  | -14.78            | -2.610         |
|            | 20                      | 22.78 $\pm$ 1.940   | 8.520            | 13.90          | 21.32 $\pm$ 2.100   | 9.850             | 6.600          |
| 1,3-diCOQ  | 0.5                     | 0.5100 $\pm$ 0.0600 | 11.86            | 1.200          | 0.4600 $\pm$ 0.0400 | -8.700            | -8.000         |
|            | 5                       | 4.880 $\pm$ 0.7200  | -14.75           | -2.400         | 4.790 $\pm$ 0.5600  | -11.69            | -4.200         |
|            | 20                      | 21.53 $\pm$ 1.880   | 8.730            | 7.650          | 22.91 $\pm$ 2.340   | 10.21             | 14.55          |
| 4,5-diCOQ  | 0.5                     | 0.5100 $\pm$ 0.0700 | 13.73            | 14.00          | 0.5100 $\pm$ 0.0600 | 11.02             | 14.00          |
|            | 5                       | 5.200 $\pm$ 0.6500  | 12.50            | 4.000          | 5.1300 $\pm$ 0.2600 | 5.070             | 2.610          |
|            | 20                      | 18.33 $\pm$ 1.290   | -7.040           | -8.350         | 21.10 $\pm$ 2.410   | 11.42             | 5.500          |
| Quercitrin | 0.5                     | 0.4700 $\pm$ 0.0500 | -10.64           | -6.020         | 0.4500 $\pm$ 0.0600 | -13.33            | -10.01         |
|            | 10                      | 11.13 $\pm$ 1.430   | 12.65            | 11.10          | 13.10 $\pm$ 1.290   | 9.850             | 13.10          |
|            | 100                     | 108.20 $\pm$ 12.88  | 11.90            | 8.200          | 92.29 $\pm$ 9.940   | -10.77            | -7.710         |

| Analytes   | Added<br>( $\mu\text{M}$ ) | inter-day(n=5)     |                  |                | intra-day(n=5)      |                   |                |
|------------|----------------------------|--------------------|------------------|----------------|---------------------|-------------------|----------------|
|            |                            | Observed           | Precision(RSD,%) | Accuracy(RE,%) | Observed            | Precision (RSD,%) | Accuracy(RE,%) |
| Hyperoside | 1                          | 1.120 $\pm$ 0.1300 | 11.61            | 12.01          | 0.8700 $\pm$ 0.0900 | -10.34            | -13.02         |
|            | 10                         | 8.940 $\pm$ 1.180  | -13.20           | -10.60         | 9.120 $\pm$ 1.350   | -14.80            | -8.800         |
|            | 100                        | 106.72 $\pm$ 10.39 | 9.740            | 6.720          | 113.2 $\pm$ 8.480   | 7.490             | 13.20          |

Table S.4 The matrix effect for 14 analytes

| Analytes   | Added( $\mu$ M) | The blood<br>micro-dialysis<br>(ME, %) | The hippocampal micro-dialysis<br>(ME,%) |
|------------|-----------------|----------------------------------------|------------------------------------------|
| Ach        | 1               | -14.90                                 | 10.30                                    |
|            | 5               | 13.20                                  | -9.39                                    |
|            | 20              | 6.88                                   | -14.02                                   |
| Gly        | 1               | -13.28                                 | 12.92                                    |
|            | 5               | -10.25                                 | -3.98                                    |
|            | 20              | 5.33                                   | -7.89                                    |
| GABA       | 1               | 14.00                                  | 14.83                                    |
|            | 5               | -9.08                                  | -3.49                                    |
|            | 20              | 5.66                                   | 8.09                                     |
| Tau        | 1               | -13.18                                 | -12.96                                   |
|            | 5               | -9.88                                  | 11.32                                    |
|            | 20              | 8.90                                   | -12.35                                   |
| Asp        | 1               | -13.99                                 | 10.25                                    |
|            | 5               | 4.24                                   | -8.90                                    |
|            | 20              | 7.99                                   | 12.00                                    |
| Glu        | 1               | 12.93                                  | -14.00                                   |
|            | 5               | -8.90                                  | 10.39                                    |
|            | 20              | 5.64                                   | -8.39                                    |
| DA         | 1               | -13.17                                 | 14.91                                    |
|            | 5               | -10.23                                 | -10.82                                   |
|            | 20              | 8.34                                   | 6.93                                     |
| NE         | 1               | 14.03                                  | 12.93                                    |
|            | 5               | -8.99                                  | 3.29                                     |
|            | 20              | -4.98                                  | 5.66                                     |
| 5-HT       | 1               | -13.79                                 | -13.02                                   |
|            | 5               | 14.54                                  | -3.27                                    |
|            | 20              | 1.09                                   | 9.94                                     |
| E          | 1               | 13.95                                  | -12.58                                   |
|            | 5               | -10.43                                 | -9.00                                    |
|            | 20              | 5.65                                   | 12.54                                    |
| 1,3-diCOQ  | 0.5             | -14.45                                 | 13.98                                    |
|            | 5               | 8.79                                   | -6.67                                    |
|            | 20              | 5.45                                   | -12.89                                   |
| 4,5-diCOQ  | 0.5             | 13.39                                  | 14.28                                    |
|            | 5               | -13.09                                 | 14.30                                    |
|            | 20              | -3.66                                  | -9.83                                    |
| Quercitrin | 0.5             | -14.20                                 | -13.98                                   |
|            | 10              | 10.41                                  | 8.35                                     |
|            | 100             | -3.99                                  | 10.26                                    |

---

| Analytes   | Added( $\mu$ M) | The blood<br>micro-dialysis<br>(ME, %) | The hippocampal micro-dialysis<br>(ME,%) |
|------------|-----------------|----------------------------------------|------------------------------------------|
|            | 1               | 14.39                                  | 11.52                                    |
| Hyperoside | 10              | -5.35                                  | -6.77                                    |
|            | 100             | 9.09                                   | 12.04                                    |

---
